# Supplementary material
Source: Research Square preprint supplement (doi:10.21203/rs.3.rs-8989200/v1)
Supplement: Supplementary file 1 [file 1d29a54c0f6846e49c3fc43a.pdf]

# Coupled Experimental and Numerical Parametric Study of Projectile Penetration into Granular Sandy Soils under Low-Velocity Impact

## Experimental

### Free-Fall Drop Tests

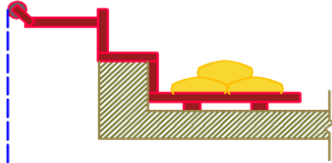

Variables:

- Conical Projectile Apex Angles,  $\alpha$
- Projectile Weight,  $W_p$
- Sand Relative Density,  $D_r$

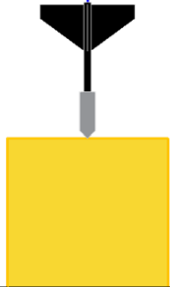

## Numerical

### Abaqus 2024 CEL Framework

Variables:

- Conical Projectile Apex Angles,  $\alpha$
- Projectile Weight,  $W_p$
- Sand Internal Friction Angle,  $\phi$
- Drop Height,  $H$
- Projectile Nose Geometry
- Projectile Diameter,  $D$
- Impact Angle,  $\theta$

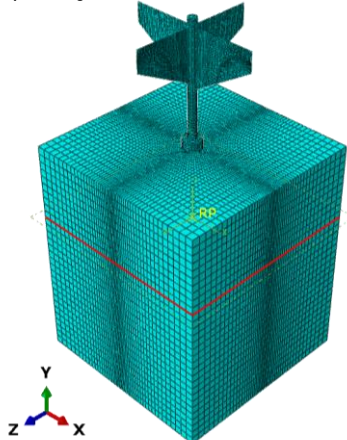

## Key Findings

### Penetration Depth, $d_p$

|                                                 |   |
|-------------------------------------------------|---|
| ▼ With Sand Relative Density, $D_r$             | ▲ |
| ▼ With Conical Projectile Apex Angles, $\alpha$ | ▲ |
| ▼ With Projectile Weight, $W_p$                 | ▼ |
| ▼ With Sand Internal Friction Angle, $\phi$     | ▲ |
| ▼ With Drop Height, $H$                         | ▼ |
| ▼ With Projectile Diameter, $D$                 | ▲ |
| ▼ With Impact Angle, $\theta$                   | ▼ |
